# Supplementary material for: Impact of Morphine Treatment on Infarct Size and Reperfusion Injury in Acute Reperfused ST-Elevation Myocardial Infarction
Source: PubMed Central journal article supplement (PMC7141264; doi:10.3390/jcm9030735), 2020-03-09

**Supplemental Figure 1A and 1B: Kaplan Meier Event Curves With Landmark Analysis from 30 days (A) and 2 months (B) follow-Up.**

**Figure 1A**

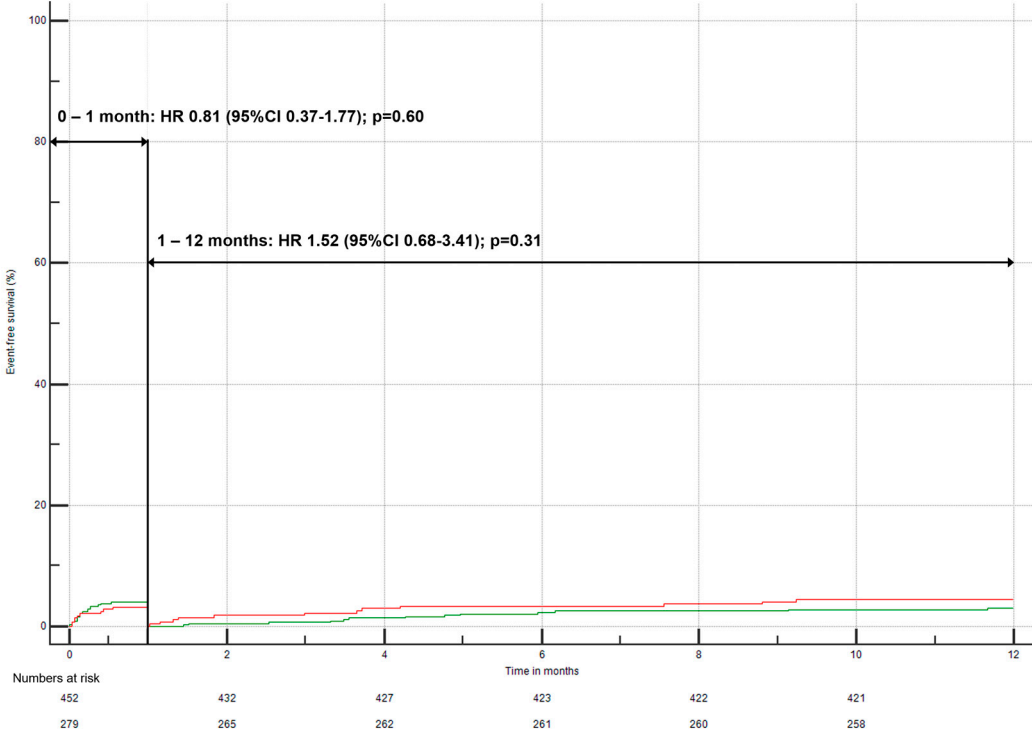

**Figure 1B**

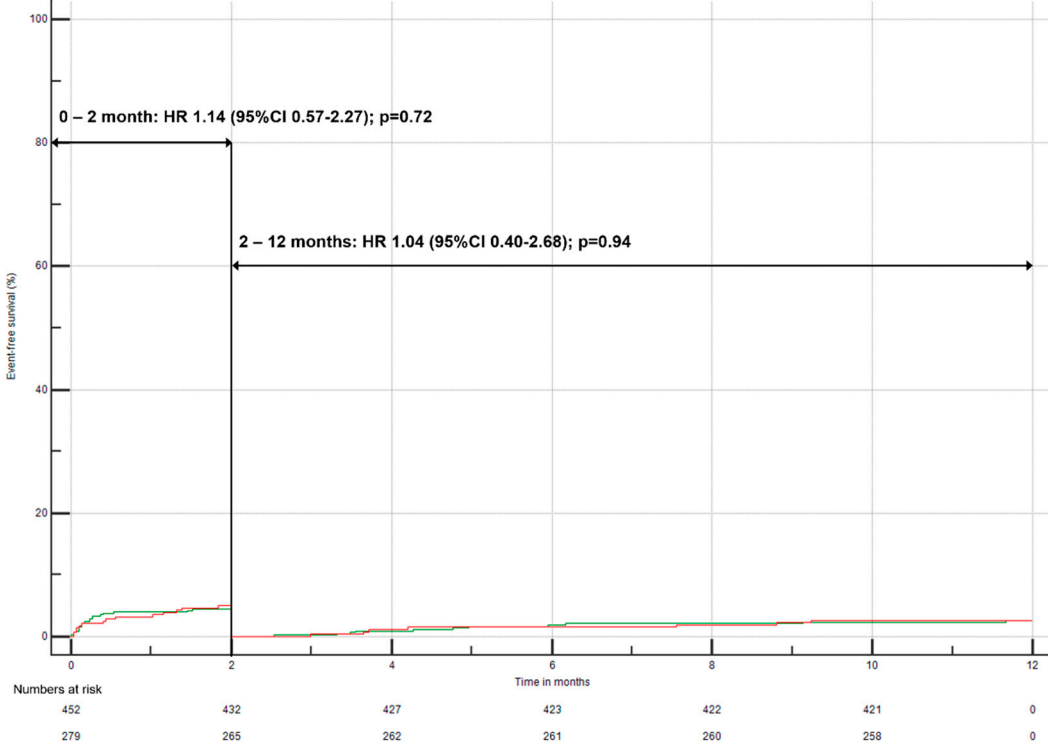

Supplement: jcm-09-00735-s001.pdf [file jcm-09-00735-s001.pdf]
